# Supplementary material for: An open-source platform for head-fixed operant and consummatory behavior
Source: eLife. 2023 Aug 9;12:e86183. doi: 10.7554/eLife.86183 (PMC10499376; doi:10.7554/eLife.86183)
Supplement: Source data 1. [file elife-86183-data1.xlsx]

## Sheet: Sheet1
Figure	Panel	Description	Statistic	n	Effect or Contrast	Parameter	Statistic	P Value	Symbol
figure 2	c	Session vs. Trial Lick Proportion	RM ANOVA (One Within)	31	Session (within)	2, 60	1.97763	0.147316
	d	Session vs. Trial Lick Latency Mean	RM ANOVA (One Within)	31	Session (within)	2, 60	11.4784	6.01142e-05	***
			Tukey Honest Significant Difference		session 1 vs 2	60	2.65576	0.0269606	*
					session 1 vs 3	60	4.78155	3.44536e-05	***
					session 2 vs 3	60	2.12578	0.0931473
	e	Session vs. Mean Trial Lick Count	RM ANOVA (One Within)	31	session (within)	2, 60	2.6808	0.0767107
	g	Session 1 & 6 vs. Cummulative Position	Welch Two Sample T-Test (Paired, Two-Sided)	31	session 1 vs 6	30	-8.02983	5.80028e-09	***
	h	Session 1 & 6 vs. Rotation	RM ANOVA (Two Within)	31	session (within)	1, 30	70.1539	2.38911e-09	***
					rotation direction (within)	1, 30	71.4783	1.95682e-09	***
					session x rotation_direction (interaction)	1, 30	64.4782	5.80028e-09	***
			Tukey Honest Significant Difference		active; session 1 vs 6	52.8733	-11.3505	0.00e-308	***
					inactive; session 1 vs 6	52.8733	1.92734	0.229162
	i	Session vs. Rotation	RM ANOVA (Two Within)	31	session (within)	5, 150	22.246	1.21654e-16	***		F(5, 150), ***p=1.2165426857994E-16
					rotation direction (within)	1, 30	78.162	7.429e-10	***		F(1, 30), ***p=7.4290011505593E-10
					session x rotation_direction (interaction)	5, 150	23.5422	2.02852e-17	***		F(5, 150), ***p=2.0285246397017E-17
			Tukey Honest Significant Difference		session 1; active vs inactive	53.4997	2.73322	0.238851
					session 2; active vs inactive	53.4997	6.75994	6.66804e-07	***
					session 3; active vs inactive	53.4997	7.63973	2.56675e-08	***
					session 4; active vs inactive	53.4997	8.50642	1.0562e-09	***
					session 5; active vs inactive	53.4997	9.76107	1.0722e-11	***
					session5; active vs inactive	53.4997	10.2228	1.46594e-12	***
					active; session 1 vs 2	285.11	-7.81753	7.50155e-12	***
					active; session 1 vs 3	285.11	-9.58027	5.93747e-13	***
					active; session 1 vs 4	285.11	-10.2495	5.95302e-13	***
					active; session 1 vs 5	285.11	-12.7074	4.82059e-13	***
					active; session 1 vs 6	285.11	-12.6981	4.82059e-13	***
					active; session 2 vs 5	285.11	-4.88991	0.000106201	***
					active; session 2 vs 6	285.11	-4.88058	0.000110872	***
	j	Cost 1/2 & 1 vs. Rotation	RM ANOVA (Two Within)	31	cost (within)	1, 30	83.3247	3.66202e-10	***
					rotation direction (within)	1, 30	79.6919	6.00295e-10	***
					cost x rotation_direction (interaction)	1, 30	31.2837	4.36728e-06	***
			Tukey Honest Significant Difference		active; cost 1/2 vs 1	55.1317	-9.91573	4.56535e-12	***
					inactive; cost 1/2 vs 1	55.1317	-0.906857	0.801248
	k	Breakpoint vs Reward Volume (solenoid openings); logorithmic	RM ANOVA (One Within)	28	reward volume (within)	2,26	3.44834	0.0469543	*
			Tukey Honest Significant Difference		volume 1 vs 5	26	-0.449254	0.895162
					volume 1 vs 10	26	-2.46542	0.05212
					volume 5 vs 10	26	2.01616	0.128316
		Breakpoint vs Reward Volume (solenoid openings); linear	RM ANOVA (One Within)	28	reward volume (within)	2,26	3.65621	0.0398816	*
			Tukey Honest Significant Difference		volume 1 vs 5	26	1.73376	0.211987	***
					volume 1 vs 10	26	2.66407	0.0338378	*
					volume 5 vs 10	26	-0.930309	0.626411
	l	Contingency vs. Cumulative Position	Welch Two Sample T-Test (Unpaired, Two-Sided)	4	initial vs reverse	3	9.64433	0.00236644	**
figure 2 s01	d	System vs. Mean Inter-Lick Inverval	Welch Two Sample T-Test (Paired, Two-Sided)	31		30	-6.21671	7.62023e-07	***
	e	Sex vs. Total Lick Count	Welch Two Sample T-Test (Unpaired, Two-Sided)	31 (10F, 21M)	NA	19.2509	-0.556478	0.584296
	f	Cohort vs. Total Lick Count	Welch Two Sample T-Test (Unpaired, Two-Sided)	31 (14 cohort 1, 17 cohort 2)	NA	28.8218	-0.10601	0.916308
	g	Box vs. Total Lick Count	ANOVA (One Between)	31 (8 box1, 8 box2, 8 box3, 7 box4)	box (between)	3, 27	1.16518	0.341237
	h	Sex vs. Median Bout Lick Count	Welch Two Sample T-Test (Unpaired, Two-Sided)	31 (10F, 21M)	NA	28.9679	-1.22306	0.231164
	i	Cohort vs. Median Bout Lick Count	Welch Two Sample T-Test (Unpaired, Two-Sided)	14 cohort 1, 17 cohort 2	NA	15.6797	0.120721	15.6797
	j	Box vs. Median Bout Lick Count	ANOVA (One Between)	8 box1, 8 box2, 8 box3, 7 box4	box (between)	3, 27	0.733683	0.541013
	k	Sex vs. Median Bout Duration	Welch Two Sample T-Test (Unpaired, Two-Sided)	31 (10F, 21M)	NA	28.5434	-1.22578	0.2303
	l	Cohort vs. Median Bout Duration	Welch Two Sample T-Test (Unpaired, Two-Sided)	14 cohort 1, 17 cohort 2	NA	15.01951	0.166398	0.870063
	m	Box vs. Median Bout Duration	ANOVA (One Between)	8 box1, 8 box2, 8 box3, 7 box4	box (between)	3, 27	0.745857	0.534193
	s (right)	System vs. Median Bout Lick Count	Welch Two Sample T-Test (Paired, Two-Sided)	31		30	-0.0885655	0.930016
	v (right)	System vs Median Bout Duration	Welch Two Sample T-Test (Paired, Two-Sided)	31		30	-0.331417	0.742633
figure 2 s02	e (left)	Session vs. Trial Lick Proportion	RM ANOVA (One Within; One Between)	31 (10F, 21M)	session (within)	2, 58	3.45261	0.0383091	*
					sex (between)	1, 29	3.08076	0.0897839
					session x sex (interaction)	2, 58	2.41788	0.0980425
	e (right)	Sex vs. Trial Lick Proportion	Welch Two Sample T-Test (Unpaired, Two-Sided)		M vs F	10.1192	-1.30769	0.219906
	f (left)	Session vs. Trial Lick Proportion	RM ANOVA (One Within; One Between)	31 (14 cohort 1, 17 cohort 2)	session (within)	2, 58	1.68269	0.19482
					cohort (between)	1, 29	0.0807686	0.778278
					session x cohort (interaction	2, 58	2.55527	0.0863884
	f (right)	Cohort vs. Trial Lick Proportion	Welch Two Sample T-Test (Unpaired, Two-Sided)		cohort 1 vs 2	28.2839	-0.285401	0.777417
	g (left)	Session vs. Trial Lick Proportion	RM ANOVA (One Within; One Between)	31 (8 box1, 8 box2, 8 box3, 7 box4)	session (within)	2, 54	1.80458	0.174325
					box (between)	3, 27	1.01	0.403553
					session x box (interaction)	6, 54	0.423968	0.85983
	g (right)	Box vs. Trial Lick Proportion	RM ANOVA (One Between)		box (between)	3, 27	1.01	0.403553
	h (left)	Session vs. Mean Lick Latency	RM ANOVA (One Within; One Between)	31 (10F, 21M)	session (within)	2, 58	11.2127	8.45692e-05	***
					sex (between)	1, 29	9.70714	0.00411244	**
					session x sex (interaction)	2, 58	7.36291	0.00141398	**
			Tukey Honest Significant Difference		M session 1 vs F session 1	83.857	5.45042	7.24869e-06	***
	h (right)	Sex vs. Mean Lick Latency	Welch Two Sample T-Test (Unpaired, Two-Sided)		M vs F	10.3927	2.36614	0.0386478	*
	i (left)	Session vs Mean Lick Latency	RM ANOVA (One Within; One Between)	31 (14 cohort 1, 17 cohort 2)	session (within)	2, 58	10.7806	0.000104487	***
					cohort (between)	1, 29	1.01444	0.322171
					session x cohort (interaction	2, 58	0.243061	0.785018
	i (right)	Cohort vs. Mean Lick Latency	Welch Two Sample T-Test (Unpaired, Two-Sided)		cohort 1 vs 2	22.3399	0.971673	0.341617
	j (left)	Session vs Mean Lick Latency	RM ANOVA (One Within; One Between)	31 (8 box1, 8 box2, 8 box3, 7 box4)	session (within)	2, 54	19.5453	3.24541e-07	***
					box (between)	3, 27	0.592548	0.625259
					session x box (interaction)	6, 54	0.481092	0.819498
	j (right)	Box vs Mean Lick Latency	RM ANOVA (One Between)		box (between)	3, 27	0.592548	0.625259
	k (left)	Session vs. Mean Trial Lick Count	RM ANOVA (One Within; One Between)	31 (10F, 21M)	session (within)	2, 58	1.89525	0.159472
					sex (between)	1, 29	0.0654157	0.799938
					session x sex (interaction)	2, 58	0.8535	0.431201
	k (right)	Sex vs. Mean Trial Lick Count	Welch Two Sample T-Test (Unpaired, Two-Sided)		M vs F	16.6431	-0.248893	0.806489
	l (left)	Session vs. Mean Trial Lick Count	RM ANOVA (One Within; One Between)	31 (14 cohort 1, 17 cohort 2)	session (within)	2, 58	2.76836	0.0710713
					cohort (between)	1, 29	0.00050617	0.982205
					session x cohort (interaction	2, 58	6.92879	0.00200312	**
	l (right)	Cohort vs. Mean Trial Lick Count	Welch Two Sample T-Test (Unpaired, Two-Sided)		cohort 1 vs 2	28.9649	-0.0228717	0.981909
	m (left)	Session vs. Mean Trial Lick Count	RM ANOVA (One Within; One Between)	31 (8 box1, 8 box2, 8 box3, 7 box4)	session (within)	2, 54	2.98081	0.0591632
					box (between)	3, 27	0.0516752	0.984154
					session x box (interaction)	6, 54	1.41635	0.225386
	m (right)	Box vs. Mean Trial Lick Count	RM ANOVA (One Between)		box (between)	3, 27	0.0516752	0.984154
figure 2 s03	e (left)	Session vs. Active Rotation; Sex	RM ANOVA (One Within; One Between)	31 (10F, 21M)	sex (between)	1, 29	3.76281	0.0621861
					session (within)	5, 145	23.2071	4.45975e-17	***
					session x sex (interaction)	5, 145	0.926131	0.465946
	e (left)	Sex vs. Active Rotation	Welch Two Sample T-Test (Unpaired, Two-Sided)		F vs M	12.7583	-1.31547	0.211501
	f (left)	Session vs. Active Rotation; Cohort	RM ANOVA (One Within; One Between)	31 (14 cohort 1, 17 cohort 2)	cohort (between)	1, 29	2.35186	0.135972
					session (within)	5, 145	28.5711	4.36095e-20	***
					session x cohort (interaction)	5, 145	1.76146	0.124411
	f (left)	Cohort vs. Active Rotation	Welch Two Sample T-Test (Unpaired, Two-Sided)		cohort 1 vs 2	28.6876	1.65355	0.109123
	g (left)	Session vs. Active Rotation; Box	RM ANOVA (One Within; One Between)	31 (8 box1, 8 box2, 8 box3, 7 box4)	box (between)	3, 27	0.46632	0.708187
					session (within)	5, 135	28.6764	9.84492e-20	***
					session x box (interaction)	15, 135	1.48478	0.119172
	g (left)	Box vs. Active Rotation	Welch Two Sample T-Test (Unpaired, Two-Sided)		box (between)	3, 27	1.01465	0.401537
	h (left)	Session vs. Active Criteria Count; Sex	RM ANOVA (One Within; One Between)	31 (10F, 21M)	sex (between)	1, 29	5.1037	0.0315655	*
					session (within)	5, 145	5.85151	5.90862e-05	***
					session x sex (interaction)	5, 145	1.65508	0.149194
	h (left)	Sex vs. Active Criteria	Welch Two Sample T-Test (Unpaired, Two-Sided)		F vs M	12.9304	-1.31759	0.210509
	i (left)	Session vs. Active Criteria Count; Cohort	RM ANOVA (One Within; One Between)	31 (14 cohort 1, 17 cohort 2)	cohort (between)	1, 29	1.62696	0.212248
					session (within)	5, 145	5.60819	9.35008e-05	***
					session x cohort (interaction)	5, 145	1.55967	0.175154
	i (left)	Cohort vs. Active Criteria	Welch Two Sample T-Test (Unpaired, Two-Sided)		cohort 1 vs 2	28.8601	1.49982	0.144522
	j (left)	Session vs. Active Criteria Count; Box	RM ANOVA (One Within; One Between)	31 (8 box1, 8 box2, 8 box3, 7 box4)	box (between)	3, 27	0.399855	0.754202
					session (within)	5, 135	5.86975	6.11297e-05	***
					session x box (interaction)	15, 135	1.76916	0.0452551	*
	j (left)	Box vs. Active Criteria	Welch Two Sample T-Test (Unpaired, Two-Sided)		box (between)	3, 27	0.934925	0.437394
	k (left)	Session vs. Inactive Rotation; Sex	RM ANOVA (One Within; One Between)	31 (10F, 21M)	sex (between)	1, 29	0.330203	0.569971
					session (within)	5, 145	4.06839	0.00174151	**
					session x sex (interaction)	5, 145	0.795966	0.554242
	k (left)	Sex vs. Inactive Criteria	Welch Two Sample T-Test (Unpaired, Two-Sided)		F vs M	22.5098	0.206051	0.838604
	l (left)	Session vs. Inactive Rotation; Cohort	RM ANOVA (One Within; One Between)	31 (14 cohort 1, 17 cohort 2)	cohort (between)	1, 29	0.208141	0.651627
					session (within)	5, 145	4.35276	0.00101355	**
					session x cohort (interaction)	5, 145	1.28839	0.272067
	l (left)	Cohort vs. Inactive Criteria	Welch Two Sample T-Test (Unpaired, Two-Sided)		cohort 1 vs 2	28.772	-0.181553	0.857207
	m (left)	Session vs. Inactive Rotation; Box	RM ANOVA (One Within; One Between)	31 (8 box1, 8 box2, 8 box3, 7 box4)	box (between)	3, 27	1.1266	0.355812
					session (within)	5, 135	4.29982	0.00116233	**
					session x box (interaction)	15, 135	1.68845	0.0601365
	m (left)	Box vs. Inactive Criteria	Welch Two Sample T-Test (Unpaired, Two-Sided)		box (between)	3, 27	0.909739	0.449317
	n (left)	Session vs. Inactive Criteria Count; Sex	RM ANOVA (One Within; One Between)	31 (10F, 21M)	sex (between)	1, 29	0.202872	0.655762
					session (within)	5, 145	23.8024	2.00057e-17	***
					session x sex (interaction)	5, 145	1.02336	0.406165
	n (left)	Sex vs. Inactive Criteria	Welch Two Sample T-Test (Unpaired, Two-Sided)		F vs M	17.2088	0.340377	0.737693
	o (left)	Session vs. Inactive Criteria Count; Cohort	RM ANOVA (One Within; One Between)	31 (14 cohort 1, 17 cohort 2)	cohort (between)	1, 29	0.0170955	0.896876
					session (within)	5, 145	26.1979	8.64439e-19	***
					session x cohort (interaction)	5, 145	1.76082	0.124547
	o (left)	Cohort vs. Inactive Criteria	Welch Two Sample T-Test (Unpaired, Two-Sided)		cohort 1 vs 2	28.7293	-0.876744	0.387898
	p (left)	Session vs. Inactive Criteria Count; Box	RM ANOVA (One Within; One Between)	31 (8 box1, 8 box2, 8 box3, 7 box4)	box (between)	3, 27	0.499579	0.685714
					session (within)	5, 135	24.3351	2.09204e-17	***
					session x box (interaction)	15, 135	0.850925	0.619833
	p (left)	Box vs. Inactive Criteria	Welch Two Sample T-Test (Unpaired, Two-Sided)		box (between)	3, 27	0.434645	0.72995
	q (left)	Session vs. Lick Count; Sex	RM ANOVA (One Within; One Between)	31 (10F, 21M)	sex (between)	1, 29	5.76069	0.0230316	*
					session (within)	5, 145	7.15571	5.17765e-06	***
					session x sex (interaction)	5, 145	0.647074	0.664158
	q (left)	Sex vs. Lick Count	Welch Two Sample T-Test (Unpaired, Two-Sided)		F vs M	13.5897	-1.51837	0.151838
	r (left)	Session vs. Lick Count; Cohort	RM ANOVA (One Within; One Between)	31 (14 cohort 1, 17 cohort 2)	cohort (between)	1, 29	0.119695	0.731863
					session (within)	5, 145	9.51979	7.17608e-08	***
					session x cohort (interaction)	5, 145	6.62876	1.37691e-05	***
	r (left)	Cohort vs. Lick Count	Welch Two Sample T-Test (Unpaired, Two-Sided)		cohort 1 vs 2	28.8197	1.34967	0.18763
	s (left)	Session vs. Lick Count; Box	RM ANOVA (One Within; One Between)	31 (8 box1, 8 box2, 8 box3, 7 box4)	box (between)	3, 27	0.334015	0.800819
					session (within)	5, 135	8.11667	1.0097e-06	***
					session x box (interaction)	15, 135	1.85357	0.0333872	*
	s (left)	Box vs. Lick Count	Welch Two Sample T-Test (Unpaired, Two-Sided)		box (between)	3, 27	0.873049	0.467213
	t (left)	Session vs. Active Rotation Bias; Sex	RM ANOVA (One Within; One Between)	31 (10F, 21M)	sex (between)	1, 29	4.32917	0.0464053	*
					session (within)	5, 145	11.7134	1.60728e-09	***
					session x sex (interaction)	5, 145	0.620828	0.684115
	t (left)	Sex vs. Active Rotation Bias	Welch Two Sample T-Test (Unpaired, Two-Sided)		F vs M	10.802	-1.23015	0.244758
	u (left)	Session vs. Active Rotation Bias; Cohort	RM ANOVA (One Within; One Between)	31 (14 cohort 1, 17 cohort 2)	cohort (between)	1, 29	0.262617	0.612209
					session (within)	5, 145	13.2982	1.14523e-10	***
					session x cohort (interaction)	5, 145	1.94392	0.0905684
	u (left)	Cohort vs. Active Rotation Bias	Welch Two Sample T-Test (Unpaired, Two-Sided)		cohort 1 vs 2	24.9578	0.998734	0.327509
	v (left)	Session vs. Active Rotation Bias; Box	RM ANOVA (One Within; One Between)	31 (8 box1, 8 box2, 8 box3, 7 box4)	box (between)	3, 27	0.577256	0.634946
					session (within)	5, 135	13.1908	1.83794e-10	***
					session x box (interaction)	15, 135	1.61321	0.0778878
	v (left)	Box vs. Active Rotation Bias	Welch Two Sample T-Test (Unpaired, Two-Sided)		box (between)	3, 27	0.640228	0.595743
	w (left)	Session vs. Active Criteria Bias; Sex	RM ANOVA (One Within; One Between)	31 (10F, 21M)	sex (between)	1, 29	3.93028	0.0569694
					session (within)	5, 145	8.58096	3.8382e-07	***
					session x sex (interaction)	5, 145	0.481906	0.78934
	w (left)	Sex vs. Active Criteria Bias	Welch Two Sample T-Test (Unpaired, Two-Sided)		F vs M	9.96611	-1.21109	0.253797
	x (left)	Session vs. Active Criteria Bias; Cohort	RM ANOVA (One Within; One Between)	31 (14 cohort 1, 17 cohort 2)	cohort (between)	1, 29	0.656743	0.424313
					session (within)	5, 145	9.69289	5.2852e-08	***
					session x cohort (interaction)	5, 145	1.44323	0.212255
	x (left)	Cohort vs. Active Criteria Bias	Welch Two Sample T-Test (Unpaired, Two-Sided)		cohort 1 vs 2	21.9704	1.26313	0.219782
	y (left)	Session vs. Active Criteria Bias; Box	RM ANOVA (One Within; One Between)	31 (8 box1, 8 box2, 8 box3, 7 box4)	box (between)	3, 27	0.583183	0.631179
					session (within)	5, 135	9.79119	5.31123e-08	***
					session x box (interaction)	15, 135	1.41236	0.149921
	y (left)	Box vs. Active Criteria Bias	RM ANOVA (One Between)		box (between)	3, 27	0.583826	0.630772
figure 2 s04	c	Cost vs. Response (Freely-Moving / Head-Fixed)	RM ANOVA (three within)	31 subjects x 2 costs x 2 systems	system (within)	1, 30	0.162923	0.689342
					cost (within; low / high)	1, 30	105.263	2.50944e-11	***
					response id (within; active / inactive)	1, 30	46.5795	1.42722e-07	***
					system x cost (interaction)	1, 30	0.139449	0.711456
					system x response id (interaction)	1, 30	0.0335024	0.856001
					cost x response id (interaction)	1, 30	47.2367	1.25239e-07	***
					system x cost x response id (interaction)	1, 30	13.8588	0.000813123	***
			Tukey Honest Significant Difference		head-fixed, active; low vs high	107.106	-7.54027	4.4799e-10	***
					freely-moving, active; low vs high	107.106	-10.5917	5.78426e-14	***
					head-fixed, inactive; low vs high	107.106	-2.22745	0.344048
					freely-moving, inactive; low vs high	107.106	1.46436	0.82437
					low, active; head-fixed vs freely-moving	93.1771	-2.17097	0.378727
					high, active; head-fixed vs freely-moving	93.1771	2.09415	0.426367
					low, inactive; head-fixed vs freely-moving	93.1771	2.39393	0.256642
					high, inactive; head-fixed vs freely-moving	93.1771	-2.76626	0.11643
	d	Time Bin vs. Active Response Z-Score (Freely-Moving / Head-Fixed)	RM ANOVA (Two Within)	31 subjects x 6 time-bins x 2 systems	system (within)	1, 30	0	1
					time bin (within)	5, 150	430.006	5.40986e-87	***
					system x time bin (interaction)	5, 150	16.4977	5.8468e-13	**
			Tukey Honest Significant Difference		Time-Bin: 0-5	150	-7.10186	3.02786e-09	***
					Time-Bin: 5-10	150	5.71215	3.74673e-06	***
					Time-Bin: 10-15	150	2.79164	0.194414
					Time-Bin: 15-20	150	0.853049	0.999419
					Time-Bin: 20-25	150	0.431008	0.999999
					Time-Bin: 25-30	150	-2.68598	0.243667
	e	System vs. Body Weight Gain	Welch Two Sample T-Test (Unpaired, Two-Sided)	31 subjects x 2 systems	head-fixed vs freely-moving	30	4.37508	0.000135007	***
figure 3	d	Response ID vs. Freely-Moving Noses Poke (40Hz Summary)	RM ANOVA (One Within; One Between)	9 subjects (6 ChR2, 3 mCherry) x 2 responses	group (between)	1, 7	22.1457	0.00219329	**
					response id (within; active / inactive)	1, 7	22.2117	0.00217541	**
					group x response id (interaction)	1, 7	22.1948	0.00217997	**
			Tukey Honest Significant Difference		mCherry active vs mCherry inactive	7	0.00110008	1
					mCherry active vs ChR2 active	14	-6.65887	5.70159e-05	***
					mCherry active vs ChR2 inactive	14	0.00571686	1
					mCherry inactive vs ChR2 active	14	-6.66014	5.68992e-05	***
					mCherry inactive vs ChR2 inactive	14	0.00444644	1
					ChR2 active vs ChR2 inactive	7	8.16148	0.000352894	***
	e	Stimulation Frequency vs. Freely-Moving Nose Pokes	RM ANOVA (One Within; One Between)	9 (6 ChR2, 3 mCherry) x 6 stimulation frequencies	group (between)	1, 7	31.8881	0.000776937	***
					stim frequency (within)	5, 35	12.2508	6.64726e-07	***
					group x stim frequency (interaction)	5, 35	12.2296	6.77118e-07	***
			Tukey Honest Significant Difference		0 Hz stim; ChR2 vs mCherry	33.728	-0.102856	1
					1 Hz stim; ChR2 vs mCherry	33.728	-0.188825	1
					5 Hz stim; ChR2 vs mCherry	33.728	-1.98343	0.700606
					10 Hz stim; ChR2 vs mCherry	33.728	-4.09274	0.0113785	*
					20 Hz stim; ChR2 vs mCherry	33.728	-7.03564	2.52516e-06	***
					40 Hz stim; ChR2 vs mCherry	33.728	-6.67641	7.11677e-06	***
	f	Response ID vs. Head-Fixed Wheel Turns (40Hz Summary)	RM ANOVA (One Within; One Between)	9 (6 ChR2, 3 mCherry) x 2 responses	group (between)	1, 7	15.9537	0.00522836	**
					response id (within; active / inactive)	1, 7	22.007	0.00223147	**
					group x response id (interaction)	1, 7	22.7776	0.00202961	**
			Tukey Honest Significant Difference		mCherry active vs mCherry inactive	7	-0.049866	0.999951
					mCherry active vs ChR2 active	13.547	-6.12234	0.000158308	***
					mCherry active vs ChR2 inactive	13.547	-0.0731619	0.999852
					mCherry inactive vs ChR2 active	13.547	-6.07029	0.000172469	***
					mCherry inactive vs ChR2 inactive	13.547	-0.0211118	0.999996
					ChR2 active vs ChR2 inactive	7	8.19585	0.0003436	***
	g	Stimulation Frequency vs. Head-Fixed Wheel Turns	RM ANOVA (One Within; One Between)	9 (6 ChR2, 3 mCherry) x 6 stimulation frequencies	group (between)	1, 7	10.9963	0.012834	*
					stim frequency (within)	5, 35	8.99537	1.43614e-05	***
					group x stim frequency (interaction)	5, 35	9.50161	8.59668e-06	***
			Tukey Honest Significant Difference		0 Hz stim; ChR2 vs mCherry	25.3331	-0.199206	1
					1 Hz stim; ChR2 vs mCherry	25.3331	-0.319315	1
					5 Hz stim; ChR2 vs mCherry	25.3331	-0.597617	0.999969
					10 Hz stim; ChR2 vs mCherry	25.3331	-2.07701	0.641661
					20 Hz stim; ChR2 vs mCherry	25.3331	-4.21847	0.0117113	*
					40 Hz stim; ChR2 vs mCherry	25.3331	-6.21346	8.53979e-05	***
	h (top)	Stimulation Frequency vs Stim Count Z-Score vs System (mCherry Control)	RM ANOVA (Two Within)	3	system (within)	1, 2	0	1
					stim frequency (within)	5, 10	0.271658	0.91844
					system x stim frequency (interaction)	5, 10	0.677409	0.650526
	h (bottom)	Stimulation Frequency vs Stim Count Z-Score vs System (ChR2 )	RM ANOVA (Two Within)	3	system (within)	1, 5	0	1
					stim frequency (within)	5, 25	42.6826	1.88253e-11	***
					system x stim frequency (interaction)	5, 25	4.36983	0.00538337	**
			Tukey Honest Significant Difference		0 Hz stim; Head-Fixed vs Freely-Moving	25	1.18869	0.985142
					1 Hz stim; Head-Fixed vs Freely-Moving	25	1.3806	0.956978
					5 Hz stim; Head-Fixed vs Freely-Moving	25	-1.18623	0.985373
					10 Hz stim; Head-Fixed vs Freely-Moving	25	-2.52212	0.371291
					20 Hz stim; Head-Fixed vs Freely-Moving	25	-2.12147	0.61368
					40 Hz stim; Head-Fixed vs Freely-Moving	25	3.26054	0.100466
	i	Response ID vs. Head-Fixed Negative Reinforcement Wheel Turns (40Hz Summary)	RM ANOVA (One Within; One Between)	12 subjects (8 ChR2, 4 mCherry) x 2 responses	group (between)	1, 10	13.7806	0.00402651	**
					response id (within; active / inactive)	1, 10	9.06616	0.0130951	*
					group x response id (interaction)	1, 10	8.03125	0.0177315	*
			Tukey Honest Significant Difference		mCherry active vs mCherry inactive	10	-0.108427	0.999512
					mCherry active vs ChR2 active	19.7933	-4.65455	0.00083197	***
					mCherry active vs ChR2 inactive	19.7933	-0.738406	0.880436
					mCherry inactive vs ChR2 active	19.7933	-4.77319	0.000635936	***
					mCherry inactive vs ChR2 inactive	19.7933	-0.857038	0.826542
					ChR2 active vs ChR2 inactive	10	-5.06188	0.0023067	**
	j	Session vs. Head-Fixed Negative Reinforcement Pause Count	RM ANOVA (One Within; One Between)	12 subjects (8 ChR2, 4 mCherry) x 11 sessions	group (between)	1, 10	8.70528	0.014523	*
					session (within)	10, 100	5.64438	1.18414e-06	***
					group x session (interaction)	10, 100	6.87837	4.21645e-08	***
			Welch Two Sample T-Test (Unpaired, Two-Sided, Bonferroni Adjusted)		session 1: mCherry vs ChR2	8.83649	-1.92328	0.959206
					session 2: mCherry vs ChR2	7.76952	-1.8534	1.12253
					session 3: mCherry vs ChR2	7.42288	-2.4868	0.43912	*
					session 4: mCherry vs ChR2	7.46813	-2.42105	0.482737	*
					session 5: mCherry vs ChR2	7.78905	-2.31177	0.554388
					session 6: mCherry vs ChR2	7.84536	-3.28461	0.125579	*
					session 7: mCherry vs ChR2	7.65038	-4.0174	0.0464884	**
					session 8: mCherry vs ChR2	7.58131	-4.85767	0.016148	**
					session 9: mCherry vs ChR2	8.4757	-5.42628	0.00565617	***
					session 10: mCherry vs ChR2	7.24002	-6.6168	0.00284706	***
					session 11: mCherry vs ChR2	7.82948	-5.06191	0.0114496	**
figure 3 s02	a	Session vs. Active Nose Pokes	RM ANOVA (One Within; One Between)	9 subjects (6 ChR2, 3 mCherry) x 4 sessions	group (between)	1, 7	7.44416	0.0294066	*	F(1, 7)=7.44, *p=0.03
					session (within)	3, 21	0.741375	0.539275		F(3, 21)=0.74, p=0.54
					group x session (interaction)	3, 21	0.747521	0.535891		F(3, 21)=0.75, p=0.54
			Welch Two Sample T-Test (Unpaired, Two-Sided, Bonferroni Adjusted)		session 1: mCherry vs ChR2	5.00047	-5.65046	0.00964058	**
					session 2: mCherry vs ChR2	5.0001	-5.53958	0.0105229	*
					session 3: mCherry vs ChR2	5	-2.41974	0.240547
					session 4: mCherry vs ChR2	5	-3.37131	0.079445
	b	Session vs. Stim Count	RM ANOVA (One Within; One Between)	9 subjects (6 ChR2, 3 mCherry) x 4 sessions	group (between)	1, 7	14.6749	0.00645128	**	F(1, 7)=14.67, **p=0.01
					session (within)	3, 21	1.27904	0.307363		F(3, 21)=1.28, p=0.31
					group x session (interaction)	3, 21	1.30129	0.30024		F(3, 21)=1.3, p=0.3
			Welch Two Sample T-Test (Unpaired, Two-Sided, Bonferroni Adjusted)		session 1: mCherry vs ChR2	5.00088	-5.26227	0.0131639	*
					session 2: mCherry vs ChR2	5.00131	-8.63559	0.00137366	**
					session 3: mCherry vs ChR2	5.00003	-3.42801	0.0747017
					session 4: mCherry vs ChR2	5.00005	-5.45811	0.0112302	*
	c	Session vs. Inactive Nose Pokes	RM ANOVA (One Within; One Between)	9 subjects (6 ChR2, 3 mCherry) x 4 sessions	group (between)	1, 7	2.987	0.127567		F(1, 7)=2.99, p=0.13
					session (within)	3, 21	1.28892	0.304179		F(3, 21)=1.29, p=0.3
					group x session (interaction)	3, 21	0.562375	0.645769		F(3, 21)=0.56, p=0.65
			Welch Two Sample T-Test (Unpaired, Two-Sided, Bonferroni Adjusted)		session 1: mCherry vs ChR2	5.07848	-0.0617096	3.8126
					session 2: mCherry vs ChR2	3.32339	1.64845	0.755642
					session 3: mCherry vs ChR2	2.52108	1.51318	0.97562
					session 4: mCherry vs ChR2	2.14431	2.78543	0.401246
	d	Session vs. Active Wheel Turns	RM ANOVA (One Within; One Between)	9 subjects (6 ChR2, 3 mCherry) x 5 sessions	group (between)	1, 7	5.39902	0.0531138		F(1, 7)=5.4, p=0.05
					session (within)	4, 28	2.31875	0.0816565		F(4, 28)=2.32, p=0.08
					group x session (interaction)	4, 28	2.72909	0.0490856	*	F(4, 28)=2.73, *p=0.05
			Welch Two Sample T-Test (Unpaired, Two-Sided, Bonferroni Adjusted)		session 1: mCherry vs ChR2	5.23234	-2.55908	0.243084
					session 2: mCherry vs ChR2	5.03147	-4.23627	0.0404305	*
					session 3: mCherry vs ChR2	5.00755	-2.87551	0.173546
					session 4: mCherry vs ChR2	5.01617	-3.35066	0.101073
					session 5: mCherry vs ChR2	5.00667	-3.23812	0.114766
	e	Session vs. Stim Count	RM ANOVA (One Within; One Between)	9 subjects (6 ChR2, 3 mCherry) x 5 sessions	group (between)	1, 7	8.35688	0.0232887	*	F(1, 7)=8.36, *p=0.02
					session (within)	4, 28	0.569163	0.687122		F(4, 28)=0.57, p=0.69
					group x session (interaction)	4, 28	1.2017	0.332045		F(4, 28)=1.2, p=0.33
			Welch Two Sample T-Test (Unpaired, Two-Sided, Bonferroni Adjusted)		session 1: mCherry vs ChR2	5.18195	-2.48375	0.269391
					session 2: mCherry vs ChR2	5.12578	-4.98025	0.0194886	*
					session 3: mCherry vs ChR2	5.04569	-3.67257	0.070871
					session 4: mCherry vs ChR2	5.13285	-4.53918	0.0289547	*
					session 5: mCherry vs ChR2	5.03014	-4.17347	0.0429875	*
	f	Session vs. Inactive Wheel Turns	RM ANOVA (One Within; One Between)	9 subjects (6 ChR2, 3 mCherry) x 5 sessions	group (between)	1, 7	0.743164	0.417201		F(1, 7)=0.74, p=0.42
					session (within)	4, 28	1.35419	0.274899		F(4, 28)=1.35, p=0.27
					group x session (interaction)	4, 28	1.36606	0.270862		F(4, 28)=1.37, p=0.27
			Welch Two Sample T-Test (Unpaired, Two-Sided, Bonferroni Adjusted)		session 1: mCherry vs ChR2	6.02155	-0.430612	3.40869
					session 2: mCherry vs ChR2	5.1703	1.28929	1.25981
					session 3: mCherry vs ChR2	3.25487	1.10172	1.72656
					session 4: mCherry vs ChR2	3.97799	0.750219	2.47529
					session 5: mCherry vs ChR2	3.19165	1.35045	1.32326
	g	Session vs. Active Nose Pokes	RM ANOVA (One Within; One Between)	12 subjects (8 ChR2, 4 mCherry) x 3 sessions	group (between)	1, 10	9.07228	0.0130724	*	F(1, 10)=9.07, *p=0.01
					session (within)	3, 30	1.52149	0.229123		F(3, 30)=1.52, p=0.23
					group x session (interaction)	3, 30	1.98606	0.137284		F(3, 30)=1.99, p=0.14
			Welch Two Sample T-Test (Unpaired, Two-Sided, Bonferroni Adjusted)		session 1: mCherry vs ChR2	3	1.9868	0.564488
					session 2: mCherry vs ChR2	3.5754	2.04939	0.472188
					session 3: mCherry vs ChR2	5.0164	0.753371	1.94025
					session 4: mCherry vs ChR2	3.92961	1.80579	0.586158
	h	Session vs. Pause Count	RM ANOVA (One Within; One Between)	12 subjects (8 ChR2, 4 mCherry) x 3 sessions	group (between)	1, 10	9.78091	0.0107371	*	F(1, 10)=9.78, *p=0.01
					session (within)	3, 30	1.12108	0.356132		F(3, 30)=1.12, p=0.36
					group x session (interaction)	3, 30	1.47982	0.239918		F(3, 30)=1.48, p=0.24
			Welch Two Sample T-Test (Unpaired, Two-Sided, Bonferroni Adjusted)		session 1: mCherry vs ChR2	3	2.44949	0.366884
					session 2: mCherry vs ChR2	3.5754	2.04939	0.472188
					session 3: mCherry vs ChR2	5.0164	0.753371	1.94025
					session 4: mCherry vs ChR2	4.70938	1.85164	0.507504
	i	Session vs. Inactive Nose Pokes	RM ANOVA (One Within; One Between)	12 subjects (8 ChR2, 4 mCherry) x 3 sessions	group (between)	1, 10	14.6052	0.00336435	**	F(1, 10)=14.61, **p=0
					session (within)	3, 30	3.58263	0.0251722	*	F(3, 30)=3.58, *p=0.03
					group x session (interaction)	3, 30	4.21878	0.0132926	*	F(3, 30)=4.22, *p=0.01
			Welch Two Sample T-Test (Unpaired, Two-Sided, Bonferroni Adjusted)		session 1: mCherry vs ChR2	3	2.44949	0.366884
					session 2: mCherry vs ChR2	3.01608	2.01574	0.546926
					session 3: mCherry vs ChR2	3.92961	1.80579	0.586158
					session 4: mCherry vs ChR2	3	2.57261	0.329225
	j	Session vs. Active Wheel Turns	RM ANOVA (One Within; One Between)	12 subjects (8 ChR2, 4 mCherry) x 11 sessions	group (between)	1, 10	11.7952	0.00639104	**	F(1, 10)=11.8, **p=0.01
					session (within)	10, 100	3.34116	0.000875826	***	F(10, 100)=3.34, ***p=0
					group x session (interaction)	10, 100	4.20802	6.98024e-05	***	F(10, 100)=4.21, ***p=0
			Welch Two Sample T-Test (Unpaired, Two-Sided, Bonferroni Adjusted)		session 1: mCherry vs ChR2	9.40772	-1.40423	2.11631
					session 2: mCherry vs ChR2	8.73754	-1.52772	1.78128
					session 3: mCherry vs ChR2	7.35642	-2.31482	0.572625
					session 4: mCherry vs ChR2	7.35789	-2.18259	0.698811
					session 5: mCherry vs ChR2	7.59015	-2.06411	0.822585
					session 6: mCherry vs ChR2	7.67899	-3.24827	0.136433
					session 7: mCherry vs ChR2	8.23384	-4.74561	0.0147698	*
					session 8: mCherry vs ChR2	7.33533	-5.40522	0.00944586	**
					session 9: mCherry vs ChR2	8.00472	-6.4339	0.00221334	**
					session 10: mCherry vs ChR2	7.28027	-10.5608	0.000124072	***
					session 11: mCherry vs ChR2	7.43614	-4.84139	0.0173968	*
	k	Session vs. Pause Count	RM ANOVA (One Within; One Between)	12 subjects (8 ChR2, 4 mCherry) x 11 sessions	group (between)	1, 10	8.70528	0.014523	*	F(1, 10)=8.71, *p=0.01
					session (within)	10, 100	5.64438	1.18414e-06	***	F(10, 100)=5.64, ***p=0
					group x session (interaction)	10, 100	6.87837	4.21645e-08	***	F(10, 100)=6.88, ***p=0
			Welch Two Sample T-Test (Unpaired, Two-Sided, Bonferroni Adjusted)		session 1: mCherry vs ChR2	8.83649	-1.92328	0.959206
					session 2: mCherry vs ChR2	7.76952	-1.8534	1.12253
					session 3: mCherry vs ChR2	7.42288	-2.4868	0.43912
					session 4: mCherry vs ChR2	7.46813	-2.42105	0.482737
					session 5: mCherry vs ChR2	7.78905	-2.31177	0.554388
					session 6: mCherry vs ChR2	7.84536	-3.28461	0.125579
					session 7: mCherry vs ChR2	7.65038	-4.0174	0.0464884	*
					session 8: mCherry vs ChR2	7.58131	-4.85767	0.016148	*
					session 9: mCherry vs ChR2	8.4757	-5.42628	0.00565617	**
					session 10: mCherry vs ChR2	7.24002	-6.6168	0.00284706	**
					session 11: mCherry vs ChR2	7.82948	-5.06191	0.0114496	*
	l	Session vs. Inactive Wheel Turns	RM ANOVA (One Within; One Between)	12 subjects (8 ChR2, 4 mCherry) x 11 sessions	group (between)	1, 10	6.06247	0.0335494	*	F(1, 10)=6.06, *p=0.03
					session (within)	10, 100	0.81336	0.616387		F(10, 100)=0.81, p=0.62
					group x session (interaction)	10, 100	1.02231	0.43037		F(10, 100)=1.02, p=0.43
			Welch Two Sample T-Test (Unpaired, Two-Sided, Bonferroni Adjusted)		session 1: mCherry vs ChR2	8.807	-1.46536	1.95348
					session 2: mCherry vs ChR2	8.85701	-2.47949	0.38962
					session 3: mCherry vs ChR2	6.36494	-0.650367	5.92031
					session 4: mCherry vs ChR2	9.05553	-1.6002	1.58193
					session 5: mCherry vs ChR2	9.85721	-3.798	0.0394743	*
					session 6: mCherry vs ChR2	8.27176	-3.08677	0.158069
					session 7: mCherry vs ChR2	9.46405	-5.82058	0.00229148	**
					session 8: mCherry vs ChR2	8.79257	-2.70044	0.273625
					session 9: mCherry vs ChR2	8.97409	-2.45408	0.402428
					session 10: mCherry vs ChR2	9.94612	-2.81311	0.203143
					session 11: mCherry vs ChR2	8.83866	-3.6066	0.0644714
figure 3 s03	a (left)	Stim Count Z-Score Freely-Moving vs. Head-Fixed	Pearson's Product-Moment Correlation	6 stimulation frequencies	VGat ChR2 Correlation	4	4.64133	0.0097243	**
	a (right)	Stim Count Z-Score Freely-Moving vs. Head-Fixed	Pearson's Product-Moment Correlation	6 stimulation frequencies	VGat mCherry ChR2 Correlation	4	0.106679	0.92018
figure 4	e (left)	Stimulation Frequency vs. Paired Duration; Controls	RM ANOVA (Two Within)	7 subjects x 6 stimulation frequencies	system (within)	1, 6	0.0228581	0.884782
					stimulation frequency (within)	5, 30	2.2535	0.0745833
					system x stimulation frequency (interaction)	5, 30	1.41754	0.246422
	e (mid	Stimulation Frequency vs. Paired Duration; LHAvgat-Chr2	RM ANOVA (Two Within)	6 x 6 stimulation frequencies	system (within)	1, 5	3.35068	0.126689
					stimulation frequency (within)	5, 25	19.4869	6.64689e-08	***
					system x stimulation frequency (interaction)	5, 25	1.74688	0.160734
	e (right)	Stimulation Frequency vs. Paired Duration; LHAvglut2-Chr2	RM ANOVA (Two Within)	8 x 6 stimulation frequencies	system (within)	1, 7	4.00784	0.0853724
					stimulation frequency (within)	5, 35	66.7504	6.72708e-17	***
					system x stimulation frequency (interaction)	5, 35	1.1823	0.337609
figure 4 s02	a (left)	Paired Duraiton Freely-Moving vs. Head-Fixed; Controls	Pearson's Product-Moment Correlation	5 stimulation frequencies	mCherry control: freely-moving vs head-fixed paired duration	4	0.484456	0.653394
	a (mid)	Paired Duraiton Freely-Moving vs. Head-Fixed; Lhavgat-Chr2	Pearson's Product-Moment Correlation	5 stimulation frequencies	LHAVGat ChR2 freely-moving vs head-fixed paired duration	4	4.31682	0.0124787	*
	a (right)	Paired Duraiton Freely-Moving vs. Head-Fixed; Lhavglut2-Chr2	Pearson's Product-Moment Correlation	5 stimulation frequencies	LHAVGlut2 ChR2 freely-moving vs head-fixed paired duration	4	6.60006	0.00273057	**
figure 4 s03	a (left)	Paired Duraiton Freely-Moving vs. Head-Fixed; Control Subject	Pearson's Product-Moment Correlation	1 subject x 6 stimulation frequencies	aan01 freely-moving vs head-fixed paired duration	4	0.273573	0.797958
				1 subject x 6 stimulation frequencies	aan02 freely-moving vs head-fixed paired duration	4	-0.277914	0.794852
				1 subject x 6 stimulation frequencies	aan05 freely-moving vs head-fixed paired duration	4	0.564182	0.602762
				1 subject x 6 stimulation frequencies	aan06 freely-moving vs head-fixed paired duration	4	-0.224397	0.833445
				1 subject x 6 stimulation frequencies	aan09 freely-moving vs head-fixed paired duration	4	-1.64894	0.174506
				1 subject x 6 stimulation frequencies	aan10 freely-moving vs head-fixed paired duration	4	2.56719	0.0621631
				1 subject x 6 stimulation frequencies	aan13 freely-moving vs head-fixed paired duration	4	-0.911105	0.41378
	a (mid)	Paired Duraiton Freely-Moving vs. Head-Fixed; Lhavgat-Chr2 Subject	Pearson's Product-Moment Correlation	1 subject x 6 stimulation frequencies	aan11 freely-moving vs head-fixed paired duration	4	3.60392	0.0226788	*
				1 subject x 6 stimulation frequencies	aan12 freely-moving vs head-fixed paired duration	4	2.57313	0.0617742
				1 subject x 6 stimulation frequencies	aan15 freely-moving vs head-fixed paired duration	4	3.11219	0.035796	*
				1 subject x 6 stimulation frequencies	aan16 freely-moving vs head-fixed paired duration	4	4.98562	0.00756712	**
				1 subject x 6 stimulation frequencies	aan17 freely-moving vs head-fixed paired duration	4	-0.386832	0.718579
				1 subject x 6 stimulation frequencies	aan19 freely-moving vs head-fixed paired duration	4	1.42279	0.227878
	a (right)	Paired Duraiton Freely-Moving vs. Head-Fixed; Lhavglut2-Chr2 Subject	Pearson's Product-Moment Correlation	1 subject x 6 stimulation frequencies	aan03 freely-moving vs head-fixed paired duration	4	4.69404	0.00934969	**
				1 subject x 6 stimulation frequencies	aan04 freely-moving vs head-fixed paired duration	4	4.0616	0.0153286	*
				1 subject x 6 stimulation frequencies	aan07 freely-moving vs head-fixed paired duration	4	3.07442	0.0371327	*
				1 subject x 6 stimulation frequencies	aan08 freely-moving vs head-fixed paired duration	4	5.40788	0.00566244	**
				1 subject x 6 stimulation frequencies	aan20 freely-moving vs head-fixed paired duration	4	5.517	0.00526909	**
				1 subject x 6 stimulation frequencies	aan21 freely-moving vs head-fixed paired duration	4	2.02931	0.112301
				1 subject x 6 stimulation frequencies	aan22 freely-moving vs head-fixed paired duration	4	1.45209	0.220118
				1 subject x 6 stimulation frequencies	aan23 freely-moving vs head-fixed paired duration	4	0.995384	0.375887
figure 5	h	Multi-Spout Sucrose Concentration vs. Mean Trial Lick Count	RM ANOVA (One Within)	23 subjects x 5 concentrations	sucrose concentration (within)	4, 88	19.1755	2.2632e-11	***
			Tukey Honest Significant Difference		0% Sucrose vs 5% Sucrose	88	-2.22735	0.179371
					0% Sucrose vs 10% Sucrose	88	-4.34884	0.000347308	***
					0% Sucrose vs 20% Sucrose	88	-6.0624	3.23848e-07	***
					0% Sucrose vs 30% Sucrose	88	-7.85783	4.46392e-10	***
					5% Sucrose vs 10% Sucrose	88	-2.12149	0.220308
					5% Sucrose vs 20% Sucrose	88	-3.83505	0.00214532	**
					5% Sucrose vs 30% Sucrose	88	-5.63048	2.08404e-06	***
					10% Sucrose vs 20% Sucrose	88	-1.71356	0.431063
					10% Sucrose vs 30% Sucrose	88	-3.509	0.00624222	**
					20% Sucrose vs 30% Sucrose	88	-1.79543	0.382774
	o	Multi-Spout Quinine Concentration vs. Mean Trial Lick Count	RM ANOVA (One Within)	8 subjects x 5 concentrations	quinine concentration (within)	4, 28	27.3574	2.57974e-09	***
			Tukey Honest Significant Difference		0mM Quinine vs 0.016mM Quinine	28	-1.59378	0.513447
					0mM Quinine vs 0.063mM Quinine	28	-2.02481	0.280748
					0mM Quinine vs 0.250mM Quinine	28	2.63125	0.0915752
					0mM Quinine vs 1.000mM Quinine	28	6.94649	1.42115e-06	***
					0.016mM Quinine vs 0.063mM Quinine	28	-0.431023	0.992404
					0.016mM Quinine vs 0.250mM Quinine	28	4.22503	0.00197838	**
					0.016mM Quinine vs 1.000mM Quinine	28	8.54027	2.68001e-08	***
					0.063mM Quinine vs 0.250mM Quinine	28	4.65605	0.000630971	***
					0.063mM Quinine vs 1.000mM Quinine	28	8.97129	9.67318e-09	***
					0.250mM Quinine vs 1.000mM Quinine	28	4.31524	0.00156028	**
	v	Multi-Spout Nacl Concentration vs. Mean Trial Lick Count	RM ANOVA (One Within)	8 subjects x 5 concentrations	NaCl concentration (within)	4, 28	140.162	4.35124e-18	***
			Tukey Honest Significant Difference		0.00M NaCl vs 0.25M NaCl	28	3.48455	0.0130859	*
					0.00M NaCl vs 0.50M NaCl	28	11.6233	3.07688e-11	***
					0.00M NaCl vs 1.00M NaCl	28	17.2383	0	***
					0.00M NaCl vs 1.50M NaCl	28	19.1256	0	***
					0.25M NaCl vs 0.50M NaCl	28	8.13878	7.07532e-08	***
					0.25M NaCl vs 1.00M NaCl	28	13.7538	5.39013e-13	***
					0.25M NaCl vs 1.50M NaCl	28	15.6411	6.55032e-15	***
					0.50M NaCl vs 1.00M NaCl	28	5.61499	4.79542e-05	***
					0.50M NaCl vs 1.50M NaCl	28	7.5023	3.43686e-07	***
					1.00M NaCl vs 1.50M NaCl	28	1.88732	0.347101
figure 5 s01	a	Multi-Spout Sucrose Concentration vs. Mean Trial Lick Count	Pearson's Product-Moment Correlation	195 sessions	session lick count vs session body weight gain	193	24.7012	1.15112e-61	***
	c	Solution Set vs. Medial Inter-Lick-Interval	RM ANOVA (One Between)	39 subjects (23 sucrose, 8, quinine, 8 NaCl)	solution set	2, 36	1.55781	0.224462
	d	Trial Bin vs. Medial Trial Lick Count Across Solution Set	RM ANOVA (One Between, One Within)	39 subjects (23 sucrose, 8, quinine, 8 NaCl) x 10 trial bins	solution set (between)	2, 36	31.4742	1.24761e-08	***
					trial bin (within)	9, 324	187.869	7.01113e-123	***
					solution set x trial bin (interaction)	18, 324	34.86	8.6652e-65	***
	e	Solution Set vs. Mean Session Lick Count	RM ANOVA (One Between)	39 subjects (23 sucrose, 8, quinine, 8 NaCl)	solution set (between)	2, 36	31.4742	1.24761e-08	***
			Tukey Honest Significant Difference		multi-NaCl vs multi-quinine	36	3.07047	0.0110308	*
					multi-NaCl vs multi-sucrose	36	-3.93213	0.00104667	**
					multi-quinine vs multi-sucrose	36	-7.6724	1.30858e-08	***
	f	Solution Set vs. Proportion Of Trials With A Lick	RM ANOVA (One Between)	39 subjects (23 sucrose, 8, quinine, 8 NaCl)	solution set (between)	2, 36	103.304	1.21667e-15	***
			Tukey Honest Significant Difference		multi-NaCl vs multi-quinine	36	11.7354	0	***
					multi-NaCl vs multi-sucrose	36	0.565004	0.839437
					multi-quinine vs multi-sucrose	36	-13.7304	0	***
	g	Mean Weight Prior To Session And Mean Session Lick Count; Multi-Nacl	Pearson's Product-Moment Correlation	8 subjects	multi_NaCl	6	1.83185	0.116688
		Mean Weight Prior To Session And Mean Session Lick Count; Multi-Quinine	Pearson's Product-Moment Correlation	8 subjects	multi_quinine	6	0.503097	0.632827
		Mean Weight Prior To Session And Mean Session Lick Count; Multi-Sucrose	Pearson's Product-Moment Correlation	23 subjects	multi_sucrose	21	2.51075	0.020301	*
	h	Mean Weight Percent Baseline Prior To Session And Mean Session Lick Count; Multi-Nacl	Pearson's Product-Moment Correlation	8 subjects	multi_NaCl	6	-2.18114	0.071948
		Mean Weight Percent Baseline Prior To Session And Mean Session Lick Count; Multi-Quinine	Pearson's Product-Moment Correlation	8 subjects	multi_quinine	6	-0.195925	0.851136
		Mean Weight Percent Baseline Prior To Session And Mean Session Lick Count; Multi-Sucrose	Pearson's Product-Moment Correlation	23 subjects	multi_sucrose	21	-0.0937592	0.926189
	i	Total Liquid Provided On Previous Day And Mean Session Lick Count; Multi-Nacl	Pearson's Product-Moment Correlation	40 sessions	multi_NaCl	38	1.45434	0.154062
		Total Liquid Provided On Previous Day And Mean Session Lick Count; Multi-Quinine	Pearson's Product-Moment Correlation	40 sessions	multi_quinine	38	-0.709743	0.482196
		Total Liquid Provided On Previous Day And Mean Session Lick Count; Multi-Sucrose	Pearson's Product-Moment Correlation	115 sessions	multi_sucrose	113	-1.47477	0.143055
	j	Session Lick Count On Previous Session And Mean Session Lick Count; Multi-Nacl	Pearson's Product-Moment Correlation	32 sessions	multi_NaCl	30	1.67843	0.103651
		Session Lick Count On Previous Session And Mean Session Lick Count; Multi-Quinine	Pearson's Product-Moment Correlation	32 sessions	multi_quinine	30	3.53683	0.00133905	**
		Session Lick Count On Previous Session And Mean Session Lick Count; Multi-Sucrose	Pearson's Product-Moment Correlation	92 sessions	multi_sucrose	90	6.19069	1.74794e-08	***
	k	Age at Expereimnt Start vs Session Lick Count	Pearson's Product-Moment Correlation	23 subjects	age vs mean session lick count	21	2.66342	0.0145402	*
	l	Age Group vs Session Lick Count	Welch Two Sample T-Test	23 subjects (10 young, 13 old)	young vs old	20.9363	-2.19442	0.0396276	*
	m	Spout ID vs Mean Trial Lick Count; Multi-Scurose	RM ANOVA (One Within)	23 subjects x 5 spouts	spout id (within)	4, 88	9.6224	1.67821e-06	***
			Tukey Honest Significant Difference		spout 1 vs spout 2	88	1.29771	0.693305
					spout 1 vs spout 3	88	-1.4316	0.609138
					spout 1 vs spout 4	88	-2.69018	0.0635175
					spout 1 vs spout 5	88	-4.28863	0.000433358	***
					spout 2 vs spout 3	88	-2.72931	0.057612
					spout 2 vs spout 4	88	-3.98789	0.0012691	**
					spout 2 vs spout 5	88	-5.58634	2.51277e-06	***
					spout 3 vs spout 4	88	-1.25857	0.717011
					spout 3 vs spout 5	88	-2.85702	0.0414856	*
					spout 4 vs spout 5	88	-1.59845	0.502392
	n	Spout ID vs Mean Trial Lick Count; Multi-Quinine	RM ANOVA (One Within)	8 subjects x 5 spouts	spout id (within)	4, 28	4.82725	0.00434493	**
			Tukey Honest Significant Difference		spout 1 vs spout 2	28	-0.712424	0.951905
					spout 1 vs spout 3	28	0.822877	0.92131
					spout 1 vs spout 4	28	-2.39684	0.145842
					spout 1 vs spout 5	28	1.67337	0.465759
					spout 2 vs spout 3	28	1.5353	0.549216
					spout 2 vs spout 4	28	-1.68441	0.45926
					spout 2 vs spout 5	28	2.38579	0.148937
					spout 3 vs spout 4	28	-3.21971	0.0247731	*
					spout 3 vs spout 5	28	0.850491	0.912214
					spout 4 vs spout 5	28	4.0702	0.00296491	**
	o	Spout ID vs Mean Trial Lick Count; Multi-NaCl	RM ANOVA (One Within)	8 subjects x 5 spouts	spout id (within)	4, 28	0.767043	0.555701
			Tukey Honest Significant Difference		spout 1 vs spout 2	28	-0.787378	0.932149
					spout 1 vs spout 3	28	-0.741539	0.944731
					spout 1 vs spout 4	28	-0.192219	0.999675
					spout 1 vs spout 5	28	-1.58564	0.5184
					spout 2 vs spout 3	28	0.0458387	0.999999
					spout 2 vs spout 4	28	0.595159	0.974685
					spout 2 vs spout 5	28	-0.798259	0.928929
					spout 3 vs spout 4	28	0.54932	0.981128
					spout 3 vs spout 5	28	-0.844097	0.914372
					spout 4 vs spout 5	28	-1.39342	0.636757
figure 5 s02	b (left)	Quinine Concentration vs. Mean Trial Lick Count; Low Quinine Set	RM ANOVA (One Within)	8 subjects x 5 concentrations	concentration (within)	4, 28	27.3574	2.57974e-09	***
			Tukey Honest Significant Difference		0mM Quinine vs 0.016mM Quinine	28	-1.59378	0.513447
					0mM Quinine vs 0.063mM Quinine	28	-2.02481	0.280748
					0mM Quinine vs 0.250mM Quinine	28	2.63125	0.0915752
					0mM Quinine vs 1.000mM Quinine	28	6.94649	1.42115e-06	***
					0.016mM Quinine vs 0.063mM Quinine	28	-0.431023	0.992404
					0.016mM Quinine vs 0.250mM Quinine	28	4.22503	0.00197838	**
					0.016mM Quinine vs 1.000mM Quinine	28	8.54027	2.68001e-08	***
					0.063mM Quinine vs 0.250mM Quinine	28	4.65605	0.000630971	***
					0.063mM Quinine vs 1.000mM Quinine	28	8.97129	9.67318e-09	***
					0.250mM Quinine vs 1.000mM Quinine	28	4.31524	0.00156028	**
	b (mid)	Quinine Concentration vs. Mean Trial Lick Count; Med Quinine Set	RM ANOVA (One Within)	8 subjects x 5 concentrations	concentration (within)	4, 28	33.78	2.42873e-10	***
			Tukey Honest Significant Difference		0mM Quinine0 vs quinine0312	28	2.08764	0.253367
					0mM Quinine0 vs quinine0781	28	1.85169	0.365664
					0mM Quinine0 vs quinine1250	28	5.89873	2.24204e-05	***
					0mM Quinine0 vs quinine5000	28	10.2997	4.86403e-10	***
					quinine0312 vs quinine0781	28	-0.235949	0.99927
					quinine0312 vs quinine1250	28	3.81109	0.00577756	**
					quinine0312 vs quinine5000	28	8.21206	5.91737e-08	***
					quinine0781 vs quinine1250	28	4.04704	0.00314882	**
					quinine0781 vs quinine5000	28	8.44801	3.34371e-08	***
					quinine1250 vs quinine5000	28	4.40097	0.00124395	**
	b (right)	Quinine Concentration vs. Mean Trial Lick Count; High Quinine Set	RM ANOVA (One Within)	8 subjects x 5 concentrations	concentration (within)	4, 28	16.3675	5.06373e-07	***
			Tukey Honest Significant Difference		0mM Quinine0 vs 0.016mM Quinine0	28	2.54718	0.108663
					0mM Quinine0 vs 0.063mM Quinine0	28	2.28441	0.17983
					0mM Quinine0 vs 0.250mM Quinine0	28	4.7765	0.000457107	***
					0mM Quinine0 vs 1.000mM Quinine0	28	7.56103	2.96437e-07	***
					0.016mM Quinine0 vs 0.063mM Quinine0	28	-0.262771	0.998884
					0.016mM Quinine0 vs 0.250mM Quinine0	28	2.22932	0.198574
					0.016mM Quinine0 vs 1.000mM Quinine0	28	5.01384	0.000241674	***
					0.063mM Quinine0 vs 0.250mM Quinine0	28	2.49209	0.121254
					0.063mM Quinine0 vs 1.000mM Quinine0	28	5.27661	0.000119147	***
					0.250mM Quinine0 vs 1.000mM Quinine0	28	2.78453	0.0662928
	e	Quinine Set vs. Mean Session Lick Count	RM ANOVA (One Within)	8 subjects x 3 quinine sets	concentration (within)	2, 14	8.7101	0.00348686	**
			Tukey Honest Significant Difference		low vs med	14	-0.152006	0.987354
					low vs high	14	3.53617	0.0086436	**
					med vs high	14	3.68818	0.00643786	**
	f	Quinine Set vs. Proportion of Trials with Lick	RM ANOVA (One Within)	8 subjects x 3 quinine sets	concentration (within)	2, 14	2.96363	0.084482
			Tukey Honest Significant Difference		low vs med	14	-1.65714	0.255617
figure 5 s03	a	Sucrose Concentration vs. Mean Trial Lick Count	RM ANOVA (One Between)	23 subjects (10 F, 13 M)	sex	1, 21	0.973891	0.334946
					concentration	4, 84	20.377	9.23597e-12	***
					sex*concentration	4, 84	1.56723	0.190569
	b	Sex vs. Mean Session Lick Count; Multi-Sucrose	Welch Two Sample T-Test	23 subjects (10 F, 13 M)	sucrose: M vs F	18.5508	0.974943	0.342131
	c	Sex vs. Proportion Of Trials With Lick; Multi-Sucrose	Welch Two Sample T-Test	23 subjects (10 F, 13 M)	sucrose: M vs F	20.6924	2.20555	0.0388691	*
	d	Quinine Concentration vs. Mean Trial Lick Count	RM ANOVA (One Between)	8 subjects (4 F, 4 M)	sex	1, 6	0.0173167	0.899608
					concentration	4, 24	27.0938	1.3654e-08	***
					sex*concentration	4, 24	0.93254	0.46179
	e	Sex vs. Mean Session Lick Count; Multi-Quinine	Welch Two Sample T-Test	8 subjects (4 F, 4 M)	quinine: M vs F	4.37941	0.131593	0.901133
	f	Sex vs. Proportion Of Trials With Lick; Multi-Quinine	Welch Two Sample T-Test	8 subjects (4 F, 4 M)	quinine: M vs F	4.97796	0.600074	0.574725
	g	Nacl Concentration vs. Mean Trial Lick Count	RM ANOVA (One Between)	8 subjects (4 F, 4 M)	sex	1, 6	2.91722	0.138504
					concentration	4, 24	124.85	1.07574e-15	***
					sex*concentration	4, 24	0.235274	0.915698
	h	Sex vs. Mean Session Lick Count; Multi-Nacl	Welch Two Sample T-Test	8 subjects (4 F, 4 M)	NaCl: M vs F	5.91437	1.70824	0.139173
	i	Sex vs. Proportion Of Trials With Lick; Multi-Nacl	Welch Two Sample T-Test	8 subjects (4 F, 4 M)	NaCl: M vs F	3.89449	3.05631	0.0391481	*
figure 5 s04	a	Multi-Spout Sucrose Concentration vs. Mean Trial Lick Proportion	RM ANOVA (One Within)	23 subjects x 5 concentrations	sucrose concentration (within)	4, 88	0.99	0.42
	b	Multi-Spout Quinine Concentration vs. Mean Trial Lick Proportion	RM ANOVA (One Within)	8 subjects x 5 concentrations	quinine concentration (within)	4, 28	0.59	0.67
	c	Multi-Spout Nacl Concentration vs. Mean Trial Lick Proportion	RM ANOVA (One Within)	8 subjects x 5 concentrations	NaCl concentration (within)	4, 28	11.39	1.29e-05	***
			Tukey Honest Significant Difference		0.00M NaCl vs 0.25M NaCl	28	-0.410979	0.993666
					0.00M NaCl vs 0.50M NaCl	28	0.851944	0.911719
					0.00M NaCl vs 1.00M NaCl	28	1.36875	0.651855
					0.00M NaCl vs 1.50M NaCl	28	5.55615	5.61649e-05	***
					0.25M NaCl vs 0.50M NaCl	28	1.26292	0.71525
					0.25M NaCl vs 1.00M NaCl	28	1.77973	0.40471
					0.25M NaCl vs 1.50M NaCl	28	5.96713	1.86772e-05	***
					0.50M NaCl vs 1.00M NaCl	28	0.51681	0.984948
					0.50M NaCl vs 1.50M NaCl	28	4.70421	0.000554736	***
					1.00M NaCl vs 1.50M NaCl	28	4.1874	0.00218356	**
figure 6	b	Sucrose Concentration vs. Mean Trial Lick Count	RM ANOVA (Two Within)	9 subjects x 5 solutions x 3 demand states	concentration (within)	4, 32	157.23	1.47984e-20	***
					demand sate (within)	2, 16	542.036	2.00259e-15	***
					concentration x demand state (interaction)	8, 64	33.8439	3.59321e-20	***
			Tukey Honest Significant Difference		0% Sucrose:ad_lib vs 0% Sucrose:fr	65.5632	-3.77828	0.0243082	*
					0% Sucrose:ad_lib vs 0% Sucrose:wr	65.5632	-19.8919	0	***
					5% Sucrose:ad_lib vs 5% Sucrose:fr	65.5632	-5.28738	0.00014406	***
					5% Sucrose:ad_lib vs 5% Sucrose:wr	65.5632	-22.4486	0	***
					10% Sucrose:ad_lib vs 10% Sucrose:fr	65.5632	-7.54274	1.85864e-08	***
					10% Sucrose:ad_lib vs 10% Sucrose:wr	65.5632	-21.9234	0	***
					20% Sucrose:ad_lib vs 20% Sucrose:fr	65.5632	-14.541	0	***
					20% Sucrose:ad_lib vs 20% Sucrose:wr	65.5632	-19.4773	0	***
					30% Sucrose:ad_lib vs 30% Sucrose:fr	65.5632	-15.8732	0	***
					30% Sucrose:ad_lib vs 30% Sucrose:wr	65.5632	-18.6509	0	***
					0% Sucrose:fr vs 0% Sucrose:wr	65.5632	-16.1137	0	***
					5% Sucrose:fr vs 5% Sucrose:wr	65.5632	-17.1612	0	***
					10% Sucrose:fr vs 10% Sucrose:wr	65.5632	-14.3807	0	***
					20% Sucrose:fr vs 20% Sucrose:wr	65.5632	-4.93636	0.00052394	***
					30% Sucrose:fr vs 30% Sucrose:wr	65.5632	-2.77774	0.284527
	c	Trial Bin vs. Mean Trial Lick Count	RM ANOVA (Two Within)	9 subjects x 10 trial bins x 3 demand states	time bin (within)	9, 72	149.633	6.19464e-43	***
					demand sate (within)	2, 16	542.036	2.00259e-15	***
					time bin x demand state (interaction)	18, 144	35.4339	7.3214e-44	***
	f	Nacl Concentration vs. Mean Trial Lick Count	RM ANOVA (Two Within)	8 subjects x 5 solutions x 2 demand states	concentration (within)	4, 24	9.04438	0.000133011	***
					demand sate (within)	1, 6	13.1922	0.0109376	*
					concentration x demand state (interaction)	4, 24	4.40707	0.00820149	**
			Tukey Honest Significant Difference		0.00M NaCl:sodium_deplete vs 0.00M NaCl:sodium_replete	25.7948	4.05073	0.0125468	*
					0.25M NaCl:sodium_deplete vs 0.25M NaCl:sodium_replete	25.7948	4.23559	0.00801862	**
					0.50M NaCl:sodium_deplete vs 0.50M NaCl:sodium_replete	25.7948	1.67358	0.799691
					1.00M NaCl:sodium_deplete vs 1.00M NaCl:sodium_replete	25.7948	0.870154	0.996163
					1.50M NaCl:sodium_deplete vs 1.50M NaCl:sodium_replete	25.7948	0.088999	1
	g	Trial Bin vs Mean Trial Lick Count	RM ANOVA (Two Within)	8 subjects x 10 trial bins x 2 demand states	time bin (within)	9, 54	2.5674	0.0154636	*
					demand sate (within)	1, 6	12.7596	0.011755	*
					time bin x demand state (interaction)	9, 54	0.975471	0.470496
figure 7	b	Free-Access Session vs. Total Lick Count	RM ANOVA (One Between, One Within)	16 subjects(8 light cycle, 8 dark cycle) x 2 sessions	cycle (between)	1, 14	58.5212	2.29641e-06	***
					session (within)	1, 14	11.9302	0.00387363	**
					cycle x session (interaction	1, 14	4.13014	0.0615486
			Tukey Honest Significant Difference		session 1; light cycle vs dark cycle	27.9694	4.08489	0.00180047	**
					session 2; light cycle vs dark cycle	27.9694	6.91106	9.54964e-07	***
	c (left)	Multi-Spout Session vs. Total Lick Count	RM ANOVA (One Between, One Within)	16 subjects (8 light cycle, 8 dark cycle) x 8 sessions	cycle (between)	1, 14	5.24031	0.0381246	*
					session (within)	7, 98	1.84141	0.0877602
					cycle x session (interaction)	7, 98	1.97262	0.0664337
			Tukey Honest Significant Difference		session 1; light cycle vs dark cycle	52.7695	3.7763	0.0306474	*
					session 2; light cycle vs dark cycle	52.7695	1.51584	0.97552
					session 3; light cycle vs dark cycle	52.7695	1.95623	0.837173
					session 4; light cycle vs dark cycle	52.7695	0.770153	0.999988
					session 5; light cycle vs dark cycle	52.7695	1.02652	0.999561
					session 6; light cycle vs dark cycle	52.7695	2.04771	0.787691
					session 7; light cycle vs dark cycle	52.7695	0.131905	1
					session 8; light cycle vs dark cycle	52.7695	1.40202	0.987948
	c (right)	Cycle vs. Total Lick Count During Multi-Spout Counter Ballanced Sessions	Welch Two Sample T-Test	16 subjects (8 light cycle, 8 dark cycle)	light cycle vs dark cycle	13.8474	-1.77053	0.0986399
	e	Sucrose Concentration vs. Mean Trial Lick Count	RM ANOVA (One Between, One Within)	16 subjects (8 light cycle, 8 dark cycle) x 5 concentrations	cycle (between)	1, 14	3.16587	0.0969028
					sucrose concentration (within)	4, 56	103.999	3.08009e-25	***
					cycle x sucrose concentration (interaction)	4, 56	5.7163	0.000625707	***
					0% sucrose; light cycle vs dark cycle	28.43	-0.186492	1
					5% sucrose; light cycle vs dark cycle	28.43	0.290717	1
					10% sucrose; light cycle vs dark cycle	28.43	1.20547	0.965401
					20% sucrose; light cycle vs dark cycle	28.43	3.0989	0.101819
					30% sucrose; light cycle vs dark cycle	28.43	2.94744	0.138527
	f	Time Bin vs. Mean Trial Lick Count	RM ANOVA (One Between, One Within)	16 subjects (8 light cycle, 8 dark cycle) x 10 time bins	cycle (between)	1, 14	3.1542	0.0974619
					time bin (within)	9, 96	42.6013	4.35656e-34	***
					cycle x time bin (interaction)	9, 96	9.18502	1.29587e-10	***
			Tukey Honest Significant Difference		trials 0-10; light cycle vs dark cycle	29.7178	4.23089	0.0214216	*
					trials 10-20; light cycle vs dark cycle	29.7178	3.77256	0.06306
					trials 20-30; light cycle vs dark cycle	29.7178	3.22544	0.196561
					trials 30-40; light cycle vs dark cycle	29.7178	1.95933	0.89436
					trials 40-50; light cycle vs dark cycle	29.7178	1.44658	0.993118
					trials 50-60; light cycle vs dark cycle	29.7178	1.26039	0.998602
					trials 60-70; light cycle vs dark cycle	29.7178	0.237755	1
					trials 70-80; light cycle vs dark cycle	29.7178	-0.260671	1
					trials 80-90; light cycle vs dark cycle	29.7178	-0.574812	1
					trials 90-100; light cycle vs dark cycle	29.7178	-0.674593	1
figure 7 s01	c inset	Lab vs. Median Inter-Lick Interval	Welch Two Sample T-Test	17 subjects(9 stuber, 8 roitman)	stuber vs roitman	8.61973	3.29334	0.00989346	**
	d	Sucrose Concentration vs. Mean Trial Lick Count	RM ANOVA (One Between, One Within)	17 subjects(9 stuber, 8 roitman) x 5 concentrations	lab (between)	1, 15	1.86724	0.191926
					concentration (within)	4, 60	229.451	1.26396e-35	***
					lab*concentration (interaction)	4, 60	1.88325	0.125079
			Tukey Honest Significant Difference		0% sucrose; roitman vs stuber	31.1404	0.0327947	1
					5% sucrose; roitman vs stuber	31.1404	1.45357	0.899816
					10% sucrose; roitman vs stuber	31.1404	2.2076	0.472756
					20% sucrose; roitman vs stuber	31.1404	1.47634	0.891338
					30% sucrose; roitman vs stuber	31.1404	0.441856	0.999985
figure 8	f	Concentration vs. Mean Fluor Z-Score; Multi-Sucrose Food-Restricted	RM ANOVA (Two Within)	9 subjects x 5 solutions x 2 brain regions	concentration (within)	4, 32	71.2907	1.77418e-15	***
					brain region (within)	1, 8	51.6264	9.38028e-05	***
					concentration x brain region (interaction)	4, 32	14.9428	5.45521e-07	***
			Tukey Honest Significant Difference		0% sucrose; NAcShL vs NAcShM	27.3024	1.55058	0.859528
					5% sucrose; NAcShL vs NAcShM	27.3024	2.80414	0.184368
					10% sucrose; NAcShL vs NAcShM	27.3024	3.99541	0.0134293	*
					20% sucrose; NAcShL vs NAcShM	27.3024	7.30907	2.74801e-06	***
					30% sucrose; NAcShL vs NAcShM	27.3024	9.0431	4.4035e-08	***
	g	Mean Fluor Z-Score vs. Lick Count; Multi-Sucrose Food-Restricted	Pearson's Product-Moment Correlation	2123 trials	mean fluor z-score vs lick count; NAcShL	2121	43.1372	2.06037e-292	***
			Pearson's Product-Moment Correlation	2123 trials	mean fluor z-score vs lick count; NAcShM	2121	20.049	5.08291e-82	***
	j	Concentration vs. Mean Fluor Z-Score; Multi-Sucrose Water-Restricted	RM ANOVA (Two Within)	9 subjects x 5 solutions x 2 brain regions	concentration (within)	4, 32	20.8092	1.56973e-08	***
					brain region (within)	1, 8	27.8193	0.000751279	***
					concentration x brain region (interaction)	4, 32	11.6115	6.15652e-06	***
			Tukey Honest Significant Difference		0% sucrose; NAcShL vs NAcShM	14.3196	2.54577	0.321779
					5% sucrose; NAcShL vs NAcShM	14.3196	2.9487	0.177331
					10% sucrose; NAcShL vs NAcShM	14.3196	4.20443	0.0204168	*
					20% sucrose; NAcShL vs NAcShM	14.3196	5.6386	0.0016059	**
					30% sucrose; NAcShL vs NAcShM	14.3196	7.28208	0.00010975	***
	k	Mean Fluor Z-Score vs. Lick Count; Multi-Sucrose Water-Restricted	Pearson's Product-Moment Correlation	2410 trials	mean fluor z-score vs lick count; NAcShL	2408	30.5031	4.53402e-173	***
			Pearson's Product-Moment Correlation	2410 trials	mean fluor z-score vs lick count; NAcShM	2408	13.0324	1.44694e-37	***
	n	Concentration vs. Mean Fluor Z-Score; Multi-Nacl Water-Restricted	RM ANOVA (Two Within)	9 subjects x 5 solutions x 2 brain regions	concentration (within)	4, 32	123.477	5.65819e-19	***
					brain region (within)	1, 8	11.2815	0.00994953	**
					concentration x brain region (interaction)	4, 32	4.53243	0.00515846	**
			Tukey Honest Significant Difference		0.00M NaCl; NAcShL vs NAcShM	11.8599	3.02659	0.1714
					0.25M NaCl; NAcShL vs NAcShM	11.8599	4.46574	0.0179124	*
					0.50M NaCl; NAcShL vs NAcShM	11.8599	3.50173	0.0830697
					1.00M NaCl; NAcShL vs NAcShM	11.8599	2.32483	0.437584
					1.50M NaCl; NAcShL vs NAcShM	11.8599	1.85292	0.696372
	o	Mean Fluor Z-Score vs. Lick Count; Multi-Nacl Water-Restricted	Pearson's Product-Moment Correlation	2477 trials	mean fluor z-score vs lick count; NAcShL	2475	63.4587	0	***
			Pearson's Product-Moment Correlation	2477 trials	mean fluor z-score vs lick count; NAcShM	2475	55.7616	0	***
figure 8 s01	d	Concentraion vs. Mean Lick Count; Multi-Sucrose Food-Restricted	RM ANOVA (One Within)	9 subjects x 5 solutions	concentration (within)	4, 32	128.965	2.94844e-19	***
	e	Concentraion vs. Mean Lick Count; Multi-Sucrose Water-Restricted	RM ANOVA (One Within)	9 subjects x 5 solutions	concentration (within)	4, 32	16.6634	1.77352e-07	***
	f	Concentraion vs. Mean Lick Count; Multi-Nacl Water-Restricted	RM ANOVA (One Within)	9 subjects x 5 solutions	concentration (within)	4, 32	120.439	8.21303e-19	***
figure 8 s03	a	Mean Fluor Z-Score Nacshm vs. Nacshl	Pearson's Product-Moment Correlation	2123 trials	nash_med vs nash_lat	2121	44.0601	1.23923e-301	***
	b	Mean Fluor Z-Score Nacshm vs. Nacshl	Pearson's Product-Moment Correlation	2410 trials	nash_med vs nash_lat	2408	38.163	1.22658e-249	***
	c	Mean Fluor Z-Score Nacshm vs. Nacshl	Pearson's Product-Moment Correlation	2477 trials	nash_med vs nash_lat	2475	89.3239	0	***
figure 8 s04	a	Solution And Deprivaiton Set vs. Range Of Licking	RM ANOVA (One Within)	9 subjects x 3 sets	set (within)	2, 16	189.392	7.27915e-12	***
			Tukey Honest Significant Difference		sucrose food-restricted vs NaCl water-restricted	16	-5.30776	0.000197985	***
					sucrose food-restricted vs sucrose water-restricted	16	13.5621	9.99978e-10	***
					NaCl water-restricted vs sucrose water-restricted	16	18.8699	6.73328e-12	***
	b	Solution And Deprivaiton Set vs. Range Of Z-Score Response	RM ANOVA (Two Within)	9 subjects x 3 sets x 2 brain regions	brain region (within)	1, 8	14.9609	0.00475526	**
					set (within)	2, 16	82.1222	3.85536e-09	***
			Tukey Honest Significant Difference		brain region x set (interaction)	2, 16	15.9737	0.000153758	***
					NAcShL; Sucrose:FR vs NAcShM; Sucrose:FR	12.4475	5.56572	0.00117216	**
					NAcShL; Sucrose:FR vs NAcShL; NaCl:WR	22.7941	-4.08134	0.00547785	**
					NAcShL; Sucrose:FR vs NAcShM; NaCl:WR	22.0732	-2.20224	0.276099
					NAcShL; Sucrose:FR vs NAcShL; Sucrose:WR	22.7941	6.09385	4.48465e-05	***
					NAcShL; Sucrose:FR vs NAcShM; Sucrose:WR	22.0732	7.50443	2.24509e-06	***
					NAcShM; Sucrose:FR vs NAcShL; NaCl:WR	22.0732	-7.52218	2.1618e-06	***
					NAcShM; Sucrose:FR vs NAcShM; NaCl:WR	22.7941	-8.88854	1.01498e-07	***
					NAcShM; Sucrose:FR vs NAcShL; Sucrose:WR	22.0732	0.106864	0.999998
					NAcShM; Sucrose:FR vs NAcShM; Sucrose:WR	22.7941	4.05766	0.00579298	**
					NAcShL; NaCl:WR vs NAcShM; NaCl:WR	12.4475	1.06999	0.884391
					NAcShL; NaCl:WR vs NAcShL; Sucrose:WR	22.7941	10.1752	8.53618e-09	***
					NAcShL; NaCl:WR vs NAcShM; Sucrose:WR	22.0732	10.5645	5.97073e-09	***
					NAcShM; NaCl:WR vs NAcShL; Sucrose:WR	22.0732	6.77122	1.10702e-05	***
					NAcShM; NaCl:WR vs NAcShM; Sucrose:WR	22.7941	12.9462	7.75325e-11	***
					NAcShL; Sucrose:WR vs NAcShM; Sucrose:WR	12.4475	3.66146	0.0287443	*

## Sheet: Sheet2
							1	2	3	4	5	6	7	8	9	10
						e	figure 1 s04	e (left)	Session vs. Active Rotation; Sex	RM ANOVA (One Within; One Between)	31 (10F, 21M)	sex (between)	1, 29	3.76281	0.0621861
												session (within)	5, 145	23.2071	4.45975e-17	***
												session x sex (interaction)	5, 145	0.926131	0.465946
						e		e (left)		Welch Two SampleT-Test (Unpaired, Two-Sided)		F vs M	12.7583	-1.31547	0.211501
						f		f (left)	Session vs. Active Rotation; Cohort	RM ANOVA (One Within; One Between)	31 (14 cohort 1, 17 cohort 2)	cohort (between)	1, 29	2.35186	0.135972
												session (within)	5, 145	28.5711	4.36095e-20	***
												session x cohort (interaction)	5, 145	1.76146	0.124411
						f		f (left)		Welch Two SampleT-Test (Unpaired, Two-Sided)		cohort 1 vs 2	28.6876	1.65355	0.109123
						g		g (left)	Session vs. Active Rotation; Box	RM ANOVA (One Within; One Between)	31 (8 box1, 8 box2, 8 box3, 7 box4)	box (between)	3, 27	0.46632	0.708187
												session (within)	5, 135	28.6764	9.84492e-20	***
												session x box (interaction)	15, 135	1.48478	0.119172
						g		g (left)		Welch Two SampleT-Test (Unpaired, Two-Sided)		box (between)	3, 27	1.01465	0.401537
						h		h (left)	Session vs. Active Criteria Count; Sex	RM ANOVA (One Within; One Between)	31 (10F, 21M)	sex (between)	1, 29	5.1037	0.0315655	*
												session (within)	5, 145	5.85151	5.90862e-05	***
												session x sex (interaction)	5, 145	1.65508	0.149194
						h		h (left)		Welch Two SampleT-Test (Unpaired, Two-Sided)		F vs M	12.9304	-1.31759	0.210509
						i		i (left)	Session vs. Active Criteria Count; Cohort	RM ANOVA (One Within; One Between)	31 (14 cohort 1, 17 cohort 2)	cohort (between)	1, 29	1.62696	0.212248
												session (within)	5, 145	5.60819	9.35008e-05	***
												session x cohort (interaction)	5, 145	1.55967	0.175154
						i		i (left)		Welch Two SampleT-Test (Unpaired, Two-Sided)		cohort 1 vs 2	28.8601	1.49982	0.144522
						j		j (left)	Session vs. Active Criteria Count; Box	RM ANOVA (One Within; One Between)	31 (8 box1, 8 box2, 8 box3, 7 box4)	box (between)	3, 27	0.399855	0.754202
												session (within)	5, 135	5.86975	6.11297e-05	***
												session x box (interaction)	15, 135	1.76916	0.0452551	*
						j		j (left)		Welch Two SampleT-Test (Unpaired, Two-Sided)		box (between)	3, 27	0.934925	0.437394
						k		k (left)	Session vs. Inactive Rotation; Sex	RM ANOVA (One Within; One Between)	31 (10F, 21M)	sex (between)	1, 29	0.330203	0.569971
												session (within)	5, 145	4.06839	0.00174151	**
												session x sex (interaction)	5, 145	0.795966	0.554242
						k		k (left)		Welch Two SampleT-Test (Unpaired, Two-Sided)		F vs M	22.5098	0.206051	0.838604
						l		l (left)	Session vs. Inactive Rotation; Cohort	RM ANOVA (One Within; One Between)	31 (14 cohort 1, 17 cohort 2)	cohort (between)	1, 29	0.208141	0.651627
												session (within)	5, 145	4.35276	0.00101355	**
												session x cohort (interaction)	5, 145	1.28839	0.272067
						l		l (left)		Welch Two SampleT-Test (Unpaired, Two-Sided)		cohort 1 vs 2	28.772	-0.181553	0.857207
						m		m (left)	Session vs. Inactive Rotation; Box	RM ANOVA (One Within; One Between)	31 (8 box1, 8 box2, 8 box3, 7 box4)	box (between)	3, 27	1.1266	0.355812
												session (within)	5, 135	4.29982	0.00116233	**
												session x box (interaction)	15, 135	1.68845	0.0601365
						m		m (left)		Welch Two SampleT-Test (Unpaired, Two-Sided)		box (between)	3, 27	0.909739	0.449317
						n		n (left)	Session vs. Inactive Criteria Count; Sex	RM ANOVA (One Within; One Between)	31 (10F, 21M)	sex (between)	1, 29	0.202872	0.655762
												session (within)	5, 145	23.8024	2.00057e-17	***
												session x sex (interaction)	5, 145	1.02336	0.406165
						n		n (left)		Welch Two SampleT-Test (Unpaired, Two-Sided)		F vs M	17.2088	0.340377	0.737693
						o		o (left)	Session vs. Inactive Criteria Count; Cohort	RM ANOVA (One Within; One Between)	31 (14 cohort 1, 17 cohort 2)	cohort (between)	1, 29	0.0170955	0.896876
												session (within)	5, 145	26.1979	8.64439e-19	***
												session x cohort (interaction)	5, 145	1.76082	0.124547
						o		o (left)		Welch Two SampleT-Test (Unpaired, Two-Sided)		cohort 1 vs 2	28.7293	-0.876744	0.387898
						p		p (left)	Session vs. Inactive Criteria Count; Box	RM ANOVA (One Within; One Between)	31 (8 box1, 8 box2, 8 box3, 7 box4)	box (between)	3, 27	0.499579	0.685714
												session (within)	5, 135	24.3351	2.09204e-17	***
												session x box (interaction)	15, 135	0.850925	0.619833
						p		p (left)		Welch Two SampleT-Test (Unpaired, Two-Sided)		box (between)	3, 27	0.434645	0.72995
						q		q (left)	Session vs. Lick Count; Sex	RM ANOVA (One Within; One Between)	31 (10F, 21M)	sex (between)	1, 29	5.76069	0.0230316	*
												session (within)	5, 145	7.15571	5.17765e-06	***
												session x sex (interaction)	5, 145	0.647074	0.664158
						q		q (left)		Welch Two SampleT-Test (Unpaired, Two-Sided)		F vs M	13.5897	-1.51837	0.151838
						r		r (left)	Session vs. Lick Count; Cohort	RM ANOVA (One Within; One Between)	31 (14 cohort 1, 17 cohort 2)	cohort (between)	1, 29	0.119695	0.731863
												session (within)	5, 145	9.51979	7.17608e-08	***
												session x cohort (interaction)	5, 145	6.62876	1.37691e-05	***
						r		r (left)		Welch Two SampleT-Test (Unpaired, Two-Sided)		cohort 1 vs 2	28.8197	1.34967	0.18763
						s		s (left)	Session vs. Lick Count; Box	RM ANOVA (One Within; One Between)	31 (8 box1, 8 box2, 8 box3, 7 box4)	box (between)	3, 27	0.334015	0.800819
												session (within)	5, 135	8.11667	1.0097e-06	***
												session x box (interaction)	15, 135	1.85357	0.0333872	*
						s		s (left)		Welch Two SampleT-Test (Unpaired, Two-Sided)		box (between)	3, 27	0.873049	0.467213
						t		t (left)	Session vs. Active Rotation Bias; Sex	RM ANOVA (One Within; One Between)	31 (10F, 21M)	sex (between)	1, 29	4.32917	0.0464053	*
												session (within)	5, 145	11.7134	1.60728e-09	***
												session x sex (interaction)	5, 145	0.620828	0.684115
						t		t (left)		Welch Two SampleT-Test (Unpaired, Two-Sided)		F vs M	10.802	-1.23015	0.244758
						u		u (left)	Session vs. Active Rotation Bias; Cohort	RM ANOVA (One Within; One Between)	31 (14 cohort 1, 17 cohort 2)	cohort (between)	1, 29	0.262617	0.612209
												session (within)	5, 145	13.2982	1.14523e-10	***
												session x cohort (interaction)	5, 145	1.94392	0.0905684
						u		u (left)		Welch Two SampleT-Test (Unpaired, Two-Sided)		cohort 1 vs 2	24.9578	0.998734	0.327509
						v		v (left)	Session vs. Active Rotation Bias; Box	RM ANOVA (One Within; One Between)	31 (8 box1, 8 box2, 8 box3, 7 box4)	box (between)	3, 27	0.577256	0.634946
												session (within)	5, 135	13.1908	1.83794e-10	***
												session x box (interaction)	15, 135	1.61321	0.0778878
						v		v (left)		Welch Two SampleT-Test (Unpaired, Two-Sided)		box (between)	3, 27	0.640228	0.595743
						w		w (left)	Session vs. Active Criteria Bias; Sex	RM ANOVA (One Within; One Between)	31 (10F, 21M)	sex (between)	1, 29	3.93028	0.0569694
												session (within)	5, 145	8.58096	3.8382e-07	***
												session x sex (interaction)	5, 145	0.481906	0.78934
						w		w (left)		Welch Two SampleT-Test (Unpaired, Two-Sided)		F vs M	9.96611	-1.21109	0.253797
						x		x (left)	Session vs. Active Criteria Bias; Cohort	RM ANOVA (One Within; One Between)	31 (14 cohort 1, 17 cohort 2)	cohort (between)	1, 29	0.656743	0.424313
												session (within)	5, 145	9.69289	5.2852e-08	***
												session x cohort (interaction)	5, 145	1.44323	0.212255
						x		x (left)		Welch Two SampleT-Test (Unpaired, Two-Sided)		cohort 1 vs 2	21.9704	1.26313	0.219782
						y		y (left)	Session vs. Active Criteria Bias; Box	RM ANOVA (One Within; One Between)	31 (8 box1, 8 box2, 8 box3, 7 box4)	box (between)	3, 27	0.583183	0.631179
												session (within)	5, 135	9.79119	5.31123e-08	***
												session x box (interaction)	15, 135	1.41236	0.149921
						y		y (left)		RM ANOVA (One Between)		box (between)	3, 27	0.583826	0.630772
